# Supplementary material
Source: MDPI journal article supplement (https://www.mdpi.com/2076-0760/11/2/67)
Supplement: s1 [file s1]

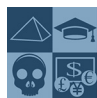

## Supplementary

Table S1. Descriptive analysis of the items of the empowerment, Conflictalk and prejudice scales.

| <i>Items</i> | <b>Median</b> | <b>Percentile 25</b> | <b>Percentile 75</b> | <b>Asymmetry</b> | <b>Kurtosis</b> |
|--------------|---------------|----------------------|----------------------|------------------|-----------------|
| <i>EMP1</i>  | 1             | 0                    | 1                    | 0.41             | -0.57           |
| <i>EMP2</i>  | 2             | 1                    | 2                    | -0.44            | -0.49           |
| <i>EMP3</i>  | 2             | 2                    | 3                    | -0.64            | -0.43           |
| <i>EMP4</i>  | 1             | 1                    | 2                    | 0.24             | -0.66           |
| <i>EMP5</i>  | 2             | 1                    | 2                    | -0.45            | -0.21           |
| <i>EMP6</i>  | 2             | 2                    | 2                    | -0.33            | -0.13           |
| <i>EMP7</i>  | 1             | 0                    | 1                    | 0.68             | -0.4            |
| <i>EMP8</i>  | 1             | 0                    | 1                    | 0.51             | -0.19           |
| <i>EMP9</i>  | 2             | 2                    | 3                    | -0.62            | 0.15            |
| <i>EMP10</i> | 2             | 1                    | 3                    | -0.51            | -0.86           |
| <i>EMP11</i> | 3             | 2                    | 3                    | -0.49            | -0.9            |
| <i>EMP12</i> | 2             | 2                    | 2                    | -0.33            | -0.15           |
| <i>EMP13</i> | 2             | 1                    | 2                    | -0.27            | -0.63           |
| <i>EMP14</i> | 2             | 1                    | 2                    | -0.01            | -0.45           |
| <i>EMP15</i> | 1             | 1                    | 2                    | 0.17             | -0.81           |
| <i>EMP16</i> | 1             | 0                    | 2                    | 0.38             | -0.76           |
| <i>EMP17</i> | 1             | 1                    | 2                    | -0.21            | -0.79           |
| <i>EMP18</i> | 2             | 2                    | 3                    | -0.37            | -0.59           |
| <i>EMP19</i> | 2             | 2                    | 3                    | -0.1             | -0.44           |
| <i>EMP20</i> | 3             | 2                    | 3                    | -0.7             | -0.65           |
| <i>EMP21</i> | 1             | 1                    | 2                    | 0.37             | -0.49           |
| <i>EMP22</i> | 1             | 1                    | 2                    | 0.35             | -0.26           |
| <i>EMP23</i> | 2             | 1                    | 2                    | -0.02            | -0.39           |
| <i>EMP24</i> | 3             | 2                    | 3                    | -1.05            | 0.49            |
| <i>EMP25</i> | 3             | 2                    | 3                    | -0.77            | -0.42           |
| <i>EMP26</i> | 2             | 2                    | 3                    | -0.46            | -0.47           |
| <i>EMP27</i> | 3             | 2                    | 3                    | -0.76            | -0.95           |
| <i>EMP28</i> | 3             | 2                    | 3                    | -0.68            | -0.75           |
| <i>CON1</i>  | 1             | 1                    | 2                    | 1.47             | 1.89            |
| <i>CON2</i>  | 2             | 2                    | 3                    | 0.34             | -0.66           |
| <i>CON3</i>  | 4             | 3                    | 5                    | -0.63            | -0.41           |
| <i>CON4</i>  | 2             | 1                    | 2                    | 1.34             | 1.15            |
| <i>CON5</i>  | 4             | 3                    | 4                    | -0.58            | -0.24           |
| <i>CON6</i>  | 3             | 2                    | 4                    | 0.18             | -0.92           |
| <i>CON7</i>  | 4             | 4                    | 5                    | -0.87            | 0.12            |
| <i>CON8</i>  | 1             | 1                    | 2                    | 1.56             | 1.68            |
| <i>CON9</i>  | 1             | 1                    | 1                    | 2.25             | 5.41            |
| <i>CON10</i> | 1             | 1                    | 1                    | 4.69             | 24.51           |
| <i>CON11</i> | 4             | 3                    | 4                    | -0.61            | 0.2             |
| <i>CON12</i> | 4             | 4                    | 5                    | -0.72            | 0.03            |
| <i>CON13</i> | 2             | 2                    | 3                    | 0.43             | -0.53           |
| <i>CON14</i> | 2             | 1                    | 2                    | 0.71             | -0.43           |
| <i>CON15</i> | 3             | 2                    | 3                    | 0.32             | -0.55           |

|              |   |   |   |       |       |
|--------------|---|---|---|-------|-------|
| <b>CON16</b> | 2 | 2 | 3 | 0.29  | -0.73 |
| <b>CON17</b> | 4 | 3 | 4 | -0.34 | -0.65 |
| <b>CON18</b> | 1 | 1 | 2 | 1.96  | 3.25  |
| <b>PRE1</b>  | 1 | 1 | 1 | 3.84  | 17.46 |
| <b>PRE2</b>  | 2 | 1 | 4 | 0.65  | -0.51 |
| <b>PRE3</b>  | 6 | 5 | 6 | -1.88 | 3.13  |
| <b>PRE4</b>  | 2 | 1 | 3 | 1.17  | 1.1   |
| <b>PRE5</b>  | 2 | 2 | 3 | 0.65  | -0.09 |
| <b>PRE6</b>  | 2 | 1 | 3 | 0.99  | 0.19  |
| <b>PRE7</b>  | 1 | 1 | 2 | 2.33  | 5.25  |
| <b>PRE8</b>  | 1 | 1 | 1 | 2.49  | 6.17  |
| <b>PRE9</b>  | 1 | 1 | 1 | 4.63  | 23.14 |
| <b>PRE10</b> | 1 | 1 | 2 | 2.4   | 7.24  |
| <b>PRE11</b> | 3 | 2 | 4 | 0.2   | -0.74 |
| <b>PRE12</b> | 6 | 6 | 6 | -5.03 | 25.98 |
| <b>PRE13</b> | 6 | 6 | 6 | -3.47 | 11.76 |
| <b>PRE14</b> | 1 | 1 | 1 | 3.47  | 16.34 |
| <b>PRE15</b> | 2 | 1 | 3 | 0.69  | -0.2  |
| <b>PRE16</b> | 3 | 2 | 4 | 0.32  | -0.35 |
| <b>PRE17</b> | 2 | 1 | 3 | 1.23  | 1.12  |
| <b>PRE18</b> | 1 | 1 | 1 | 3.46  | 12.96 |
| <b>PRE19</b> | 4 | 3 | 5 | -0.5  | -0.35 |
| <b>PRE20</b> | 5 | 4 | 6 | -0.95 | 0.56  |

Note. Own elaboration.

**Table S2.** Descriptive analysis of the dimensions of the empowerment, Conflictalk and prejudice scales.

|                             | Median | Percentile 25 | Percentile 75 | Asymmetry | Kurtosis |
|-----------------------------|--------|---------------|---------------|-----------|----------|
| <b>Empowerment</b>          |        |               |               |           |          |
| <i>Esteem</i>               | 28     | 25            | 31            | -0.32     | -0.19    |
| <i>Power</i>                | 22     | 20            | 24            | 0.06      | -0.51    |
| <i>Activism</i>             | 21     | 20            | 23            | -0.59     | -0.05    |
| <i>Control</i>              | 11     | 10            | 13            | 0         | -0.38    |
| <i>Anger</i>                | 10     | 8             | 11            | 0.01      | -0.33    |
| <b>Conflictalk</b>          |        |               |               |           |          |
| <i>Cooperative</i>          | 23     | 20            | 26            | -0.38     | -0.44    |
| <i>Passive</i>              | 14     | 11            | 16            | 0.18      | -0.14    |
| <i>Aggressive</i>           | 9      | 7             | 11            | 1.26      | 1.87     |
| <b>Prejudice</b>            |        |               |               |           |          |
| <i>Threat and rejection</i> | 8      | 6             | 11            | 1.83      | 5.62     |
| <i>Anti-intimacy</i>        | 4      | 4             | 6             | 2.72      | 11.03    |
| <i>Traditional values</i>   | 7      | 5             | 9             | 1.45      | 3.63     |
| <i>Cultural differences</i> | 11     | 8             | 13            | 0.39      | -0.2     |
| <i>Positive emotions</i>    | 9      | 8             | 10            | -0.39     | 0        |

Note. Own elaboration.

**Table S3.** Descriptive analysis of the consideration and knowledge items on the SDGs.

|                           | <b>Median</b> | <b>Percentile 25</b> | <b>Percentile 75</b> | <b>Asymmetry</b> | <b>Kurtosis</b> |
|---------------------------|---------------|----------------------|----------------------|------------------|-----------------|
| <i>SDG: Daily life</i>    | 3             | 3                    | 4                    | -0.05            | -0.15           |
| <i>SDG: Academic life</i> | 3             | 2                    | 4                    | 0.08             | -0.46           |
| <i>SDG: Future career</i> | 4             | 3                    | 4                    | -0.47            | -0.35           |
| <i>SDG: Information</i>   | 2             | 1                    | 3                    | 0.61             | -0.79           |
| <i>SDG: Knowledge</i>     | 5             | 4                    | 5                    | -0.44            | -0.03           |

*Note.* Own elaboration.
